# Supplementary material
Source: PubMed Central journal article supplement (PMC2633141)

**Differential Gene Expression in Human Conducting Airway  
Surface Epithelia and Submucosal Glands**

Anthony J. Fischer, Kelli L. Goss, Todd E. Scheetz, Christine L. Wohlford-Lenane,  
Jeanne M. Snyder, and Paul B. McCray, Jr.

Online Data Supplement

Supplemental Figure E1. Fischer et al.

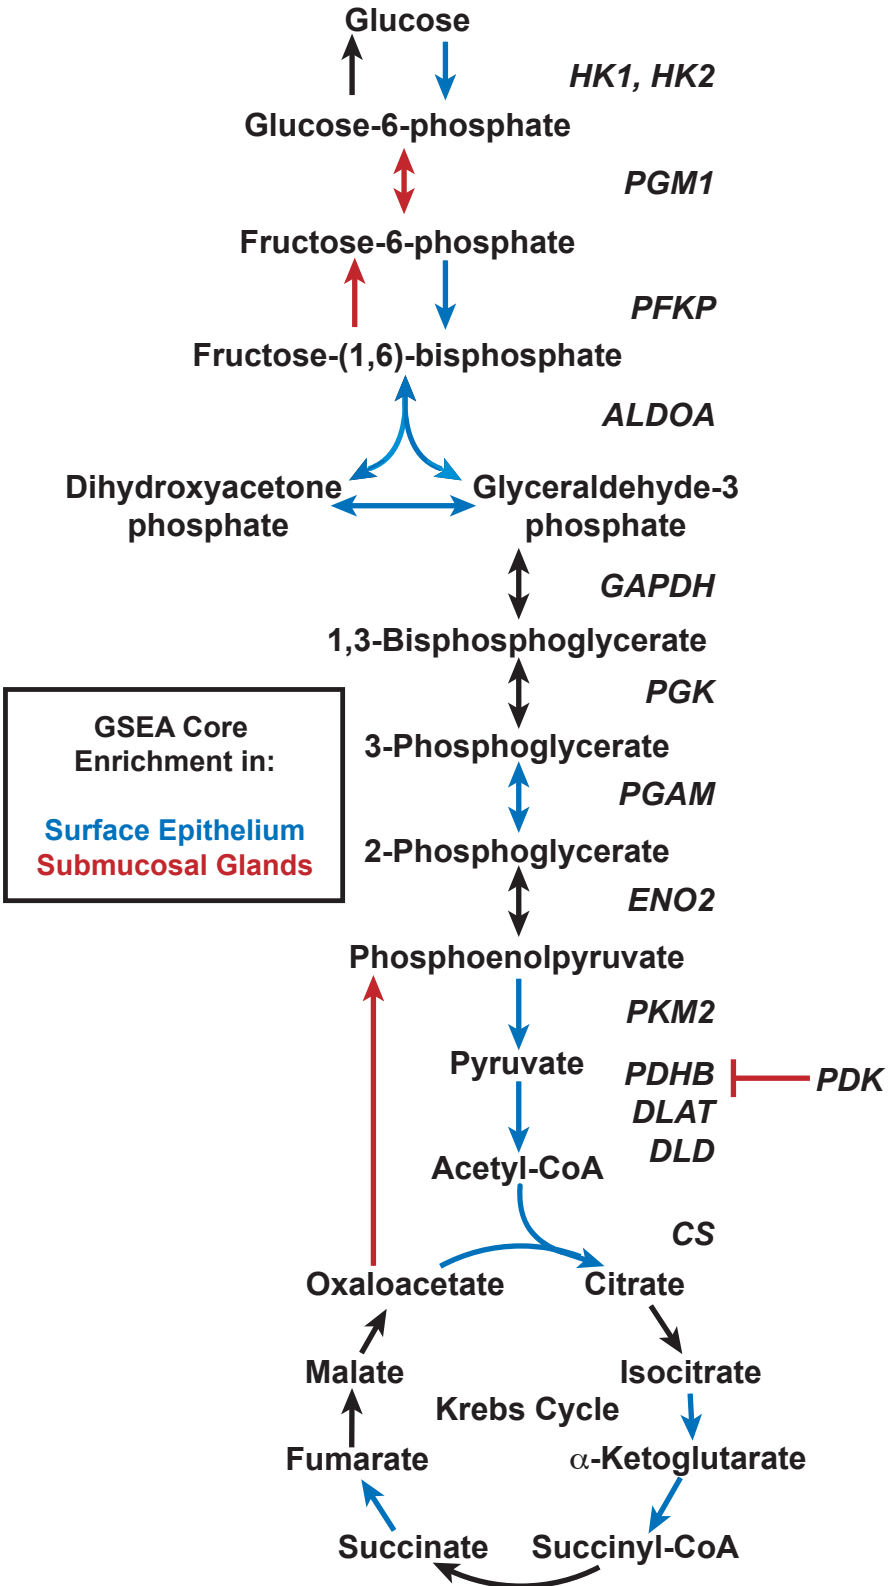

Supplement: supp_40_2_189__1.pdf [file supp_40_2_189__1.pdf]
